# Supplementary material for: Island nucleation, optical and ferromagnetic properties of vertically aligned secondary growth ZnO : Cu nanorod arrays
Source: Royal Society of Chemistry journal article supplement (doi:10.1039/c2nr11768a), 2012-01-01
Supplement: c2nr11768a.pdf [file c2nr11768a.pdf]

## Electronic Supplementary Information

### Island nucleation, optical and ferromagnetic properties of vertically aligned secondary growth ZnO:Cu nanorod arrays

Jun Huang,<sup>a</sup> Liping Zhu,<sup>\*a</sup> Liang Hu,<sup>a</sup> Shijiang Liu,<sup>b</sup> Honghai Zhang,<sup>a</sup> Jie Zhang,<sup>a</sup> Xiaopeng Yang,<sup>a</sup> Luwei Sun,<sup>a</sup> Dehui Li<sup>c</sup> and Zhizhen Ye<sup>a</sup>

<sup>a</sup> State Key Laboratory of Silicon Materials, Dept. of Materials, Zhejiang University, Hangzhou, 310027, People's Republic of China. Fax: +86-571-8795 2187; Tel: +86-571-87952;

<sup>b</sup> College of Physics and Electric Information, Luoyang Normal University, Luoyang, 471022, People's Republic of China.

<sup>c</sup> National Center of Testing Technology, Shanghai, 201203, People's Republic of China.  
E-mail: zlp1@zju.edu.cn

#### 1. Experimental Details:

The pure ZnO buffer layer with a thickness of 300 nm was prepared on (001) silicon substrate by pulsed laser deposition (PLD) using a KrF laser operating at 248 nm and a fluence of 0.38 J·cm<sup>-2</sup> at 500°C (which is the optimized temperature for good *c*-axis orientation) for 30min.

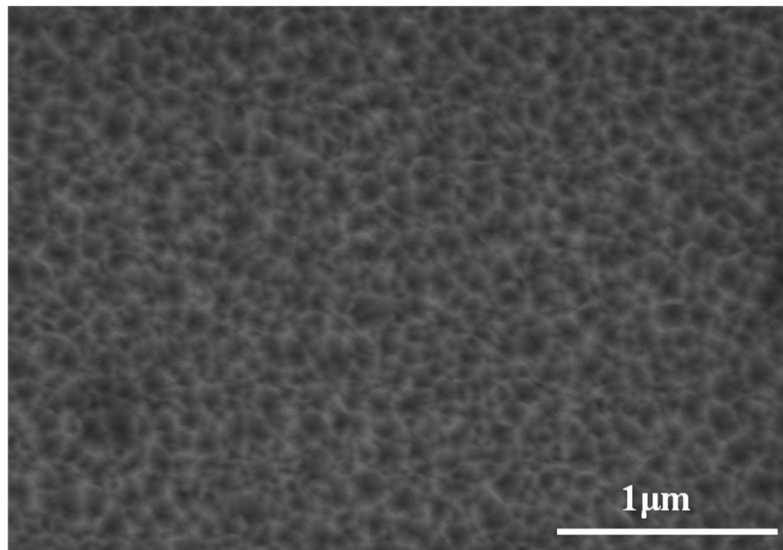

**Figure S1.** SEM image of the ZnO buffer layer grown on (100) silicon by PLD method.

2. Elements calculation formula for X-ray photoelectron spectrum (XPS) of the ZnO:Cu nanorod arrays:

$$X(\text{at}\%) = \frac{(A_x / S_x)}{\sum_{i=1}^n (A_i / S_i)} \times 100\% \quad (\text{S1})$$

here  $X$  stands for the element type,  $A_x$  stands for the area of the element  $X$  under a certain peak, and  $S_x$  is the sensitivity factor (Zn:4.8, O:0.66, Cu 6.3).

3. Scanning electron microscopy (SEM) and Energy disperse spectrum (EDS) measurements of the ZnO:Cu nanorods without secondary growth.

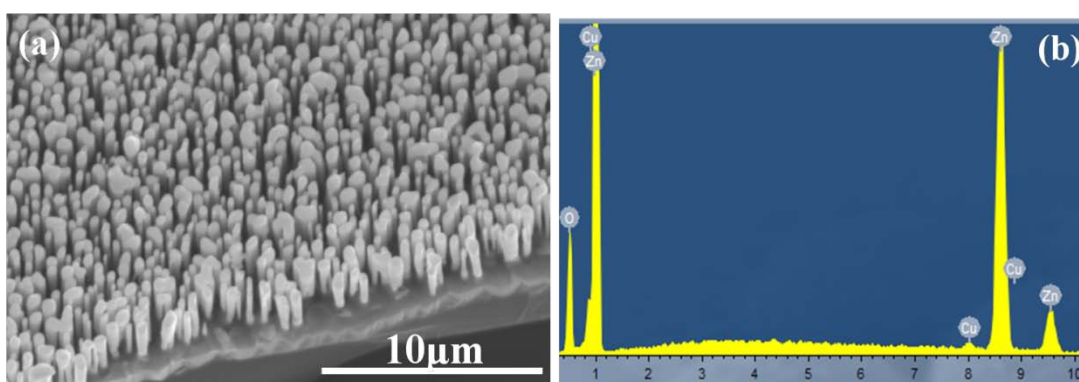

**Figure S2.** SEM, and EDS measurement of ZnO:Cu nanorod arrays (a) titled view image of the ZnO:Cu nanorod arrays without secondary growth, (b) EDS measurement of the ZnO:Cu nanorod arrays.

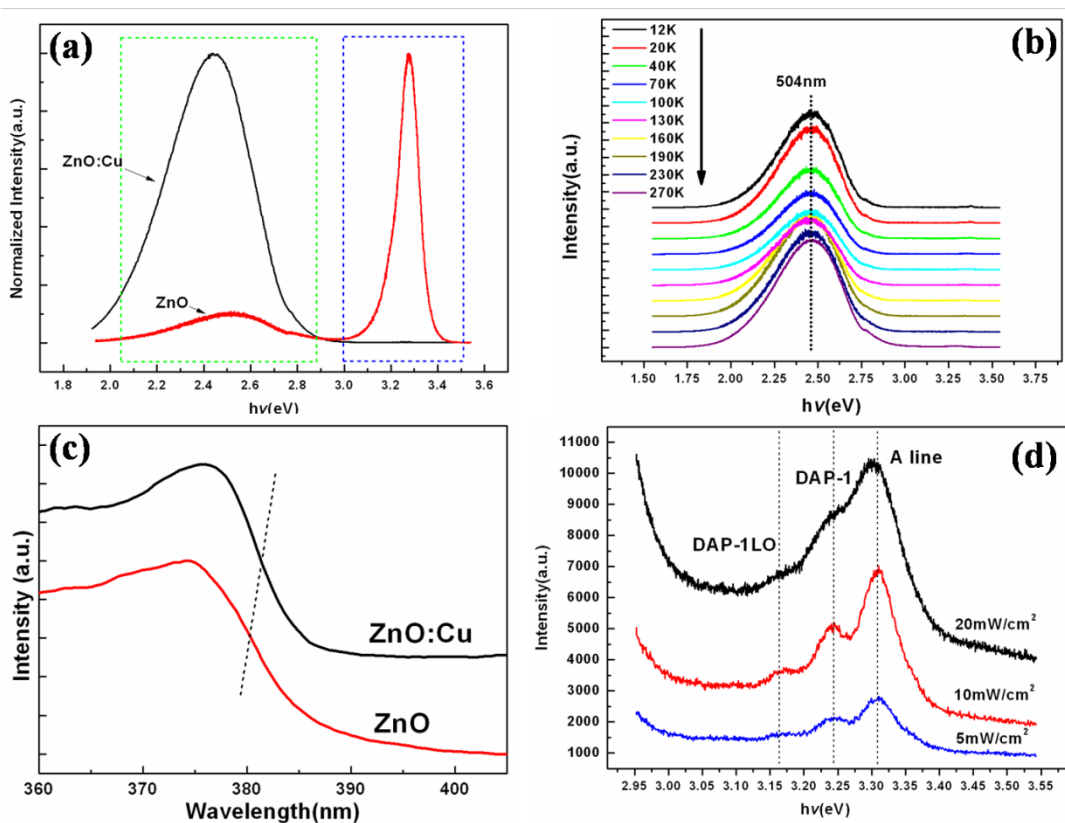

**Figure S3.** (a) Room temperature photoluminescence spectra of ZnO and secondary growth ZnO:Cu nanorods, (b) temperature-dependent PL spectra of Cu doped samples from 12K to 270K, (c) room temperature photoluminescence excitation (RT-PLE) spectra of ZnO and secondary growth ZnO:Cu nanorods, (d) excitation intensity changed spectra of secondary growth ZnO:Cu nanorods with different excitation powers.

4. Secondary growth for ZnO nanorods is also observed in our experiment.

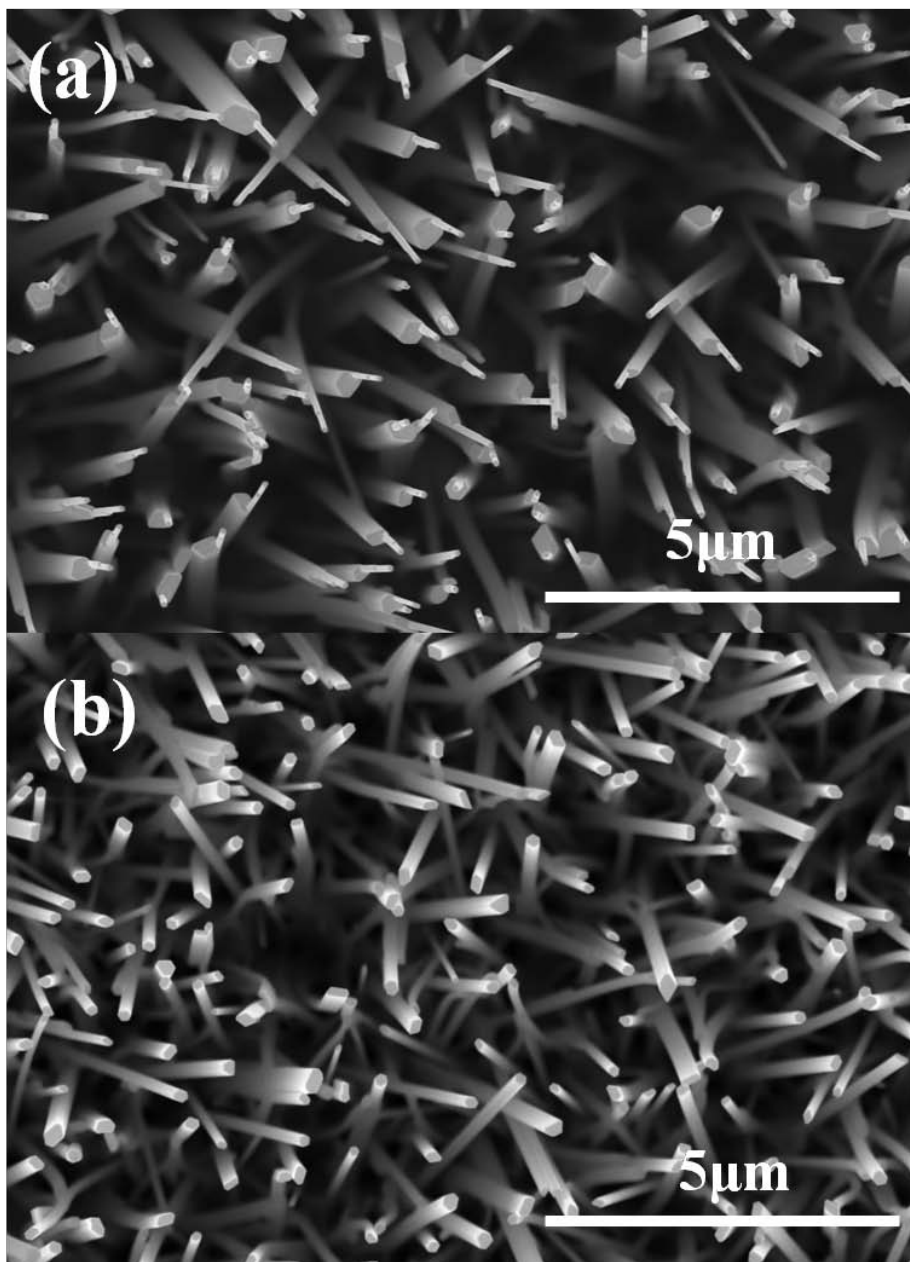

**Figure S4.** (a) ZnO nanorod arrays with secondary growth, (b) ZnO nanorod arrays without secondary growth.

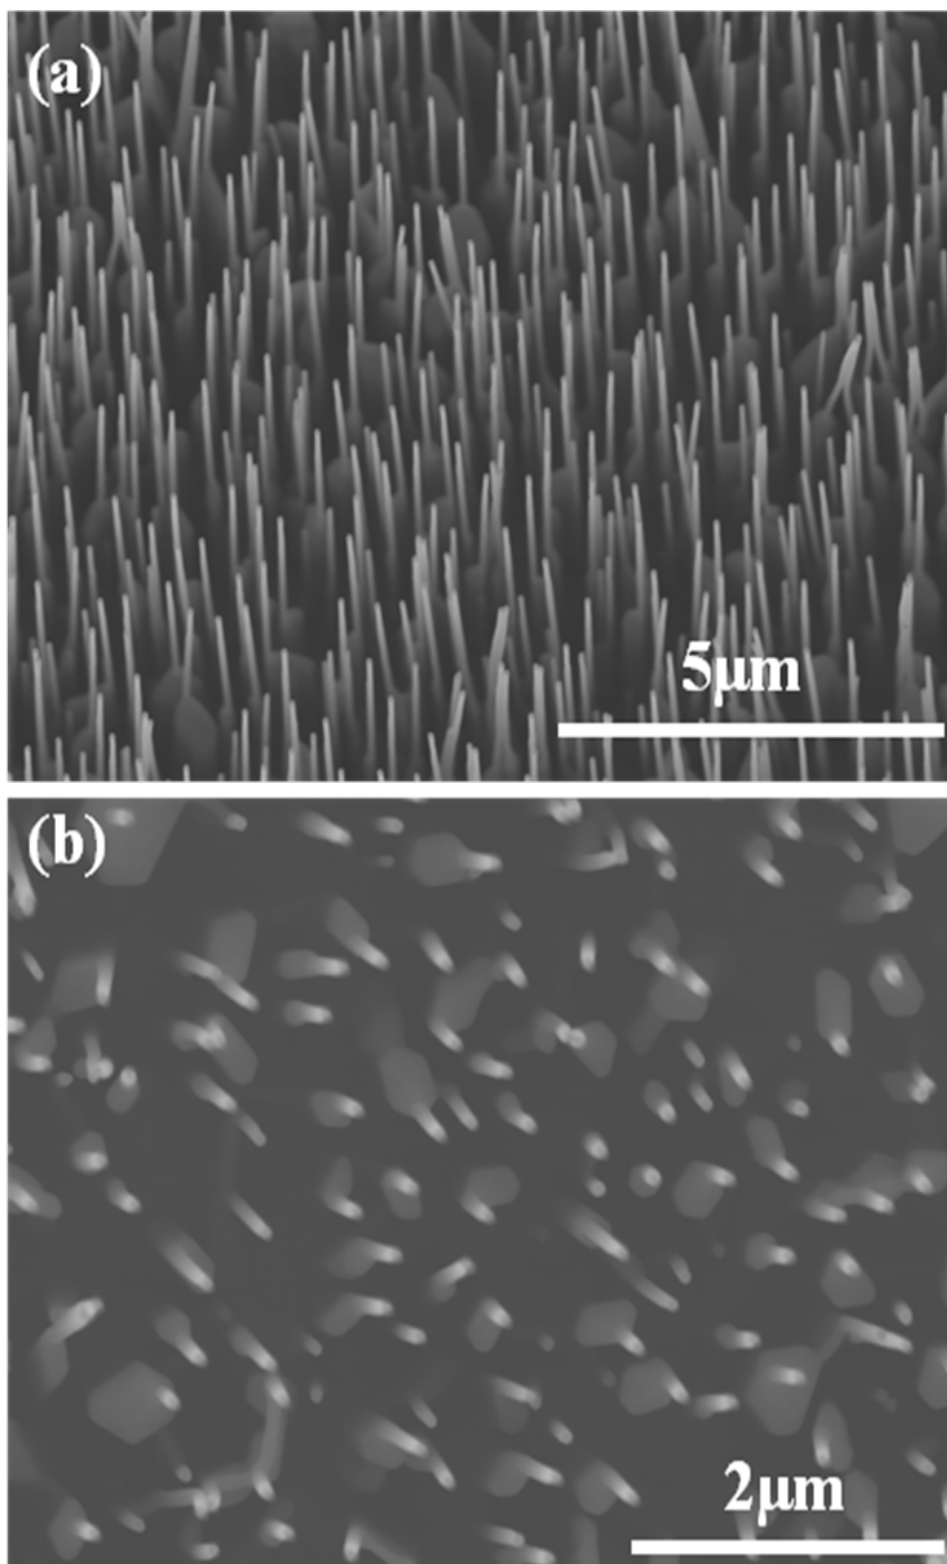

**Figure S5.** Secondary growth of ZnO:Cu nanorod arrays, (a) 15° tilted view SEM image,

(b) top view SEM image of secondary growth ZnO:Cu nanorods arrays

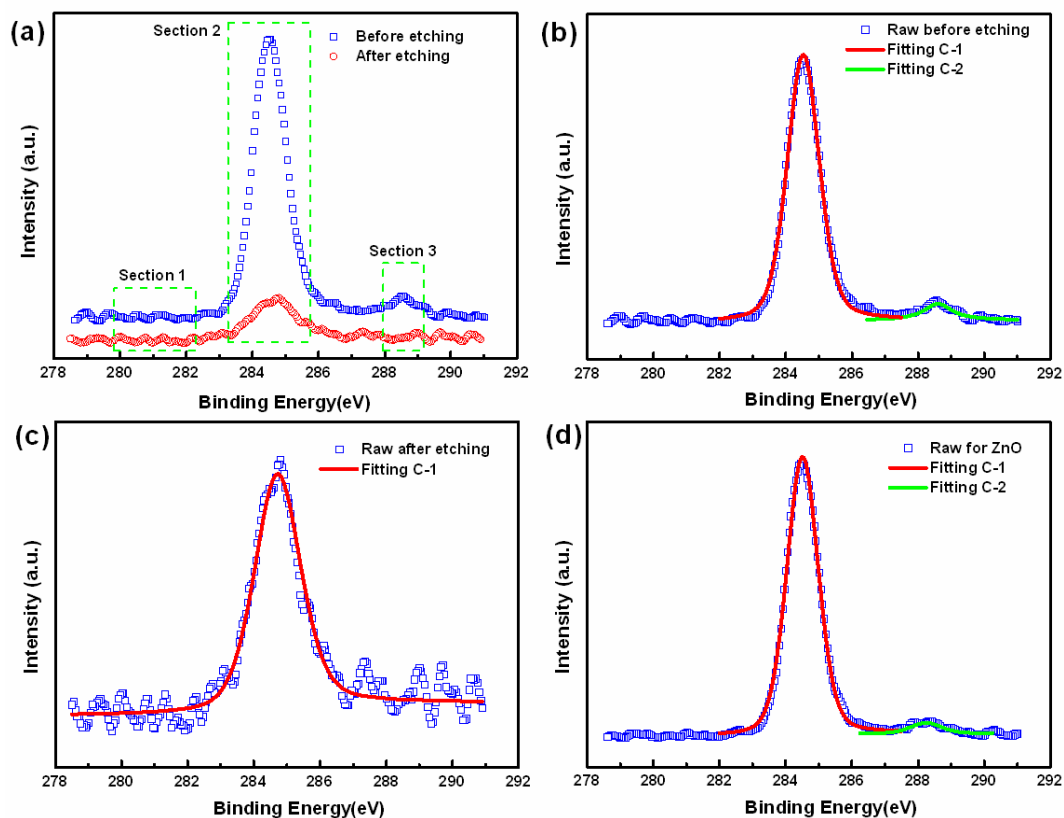

**Figure S6.** Slow scan of C 1s peak for ZnO and secondary growth ZnO:Cu nanorod arrays, (a) slow scan of C 1s peak for the secondary growth ZnO:Cu sample before etching and after etching, (b) fitting result of C 1s peak for the secondary growth ZnO:Cu sample before etching, (c) fitting result of C 1s peak for the secondary growth ZnO:Cu sample after etching, (d) fitting curves of C 1s peak for ZnO nanorods array

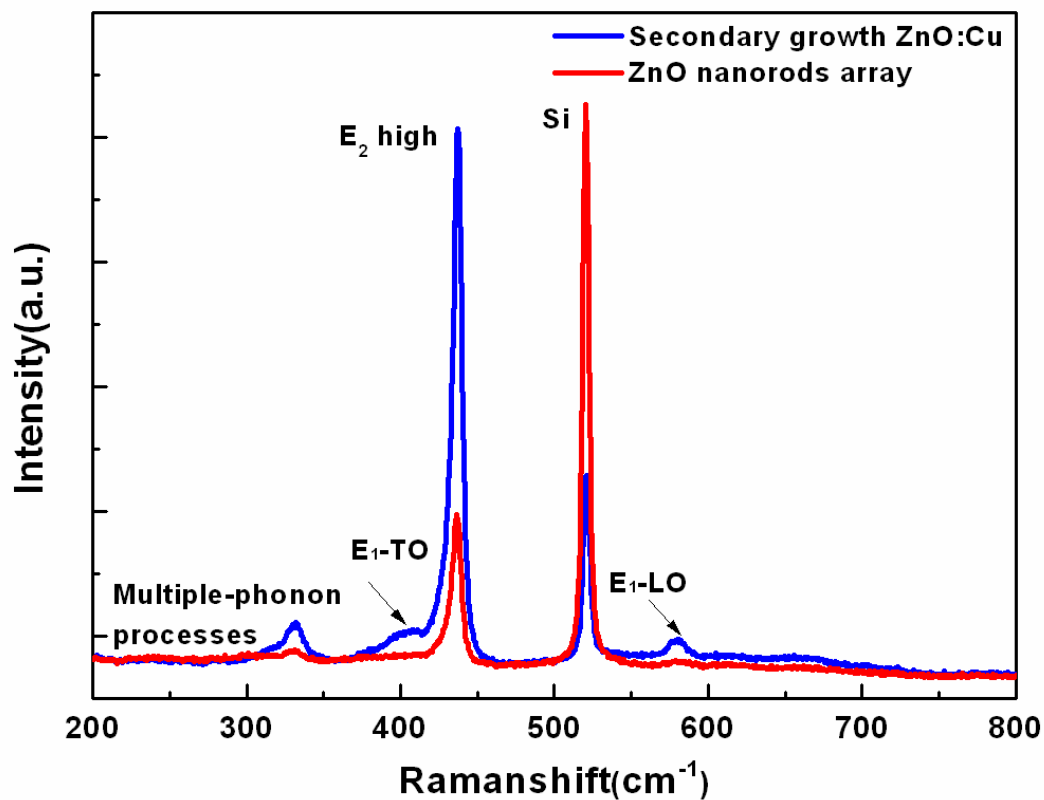

**Figure S7.** Raman spectrum of as grown ZnO nanorods array (the red line) and secondary growth ZnO:Cu nanorods array (the blue line).
